# Supplementary material for: Exogenous human α-Synuclein acts in vitro as a mild platelet antiaggregant inhibiting α-thrombin-induced platelet activation
Source: Springer Nature journal article supplement (doi:10.1038/s41598-022-12886-y), 2022-06-14
Supplement: MOESM1 [file 41598_2022_12886_MOESM1_ESM.pdf]

## SUPPLEMENTARY MATERIALS

### Exogenous human $\alpha$ -synuclein acts *in vitro* as a mild platelet antiaggregant inhibiting $\alpha$ -thrombin-induced platelet activation

Laura Acquasaliente <sup>1,+</sup>, Giulia Pontarollo <sup>1,+<sup>b</sup></sup>, Claudia Maria Radu <sup>2,3,+</sup>, Daniele Peterle <sup>1,<sup>c</sup></sup>, Ilaria Artusi <sup>1</sup>, Anna Pagotto <sup>1</sup>, Federico Uliana <sup>1,<sup>d</sup></sup>, Alessandro Negro <sup>4,\*</sup>, Paolo Simioni <sup>3,\*</sup>, Vincenzo De Filippis <sup>1,5\*</sup>

<sup>1</sup> Laboratory of Protein Chemistry and Molecular Hematology, Department of Pharmaceutical and Pharmacological Sciences, University of Padua, Padua, Italy

<sup>2</sup> Department of Women's & Children's Health, University of Padua, Padua, Italy

<sup>3</sup> Thrombotic and Hemorrhagic Diseases Unit, Department of Medicine, University of Padua, Padua, Italy

<sup>4</sup> Department of Biomedical Sciences, University of Padua, Padua, Italy

<sup>5</sup> CRIBI, Biotechnology Center, University of Padua, Padua, Italy

*\*Corresponding:* Vincenzo De Filippis, Department of Pharmaceutical and Pharmacological Sciences, School of Medicine, University of Padua, via Marzolo, 5, Padua, 35131 Italy. Phone: (+39) 0498275698, e-mail: [vincenzo.defilippis@unipd.it](mailto:vincenzo.defilippis@unipd.it). Alessandro Negro, Dept. of Biomedical Sciences, University of Padua, viale G. Colombo 3, I-35100 Padua, Italy. Phone: (+39) 0498276166, e-mail: [alessandro.negro@unipd.it](mailto:alessandro.negro@unipd.it). Paolo Simioni, Thrombotic and Hemorrhagic Diseases Unit, Department of Medicine, University of Padua, Padua, via Giustiniani, 2, 35128 Padova, Italy. Phone: (+39) 0498212667, e-mail: [paolo.simioni@unipd.it](mailto:paolo.simioni@unipd.it)

<sup>+</sup> These authors contributed equally to this work.

#### *Author information:*

<sup>b</sup> Present address: Center for Thrombosis and Hemostasis (CTH) University Medical Center Mainz, Langenbeckstraße 1, 55131 Mainz, Germany

<sup>c</sup> Present address: Dept. of Chemistry and Chemical Biology, Northeastern University, 360 Huntington Ave. 02115, Boston, MA, USA

<sup>d</sup> Present address: Institute of Molecular Systems Biology, ETH Zurich, 8093 Zurich, Switzerland.

*Running title:*  $\alpha$ -Synuclein inhibits thrombin-induced platelet aggregation

*Keywords:*  $\alpha$ -synuclein, thrombin, platelets, coagulation, Parkinson's disease.

## Extended Methods

### *Production and characterization of recombinant $\alpha$ Syn derivatives*

All recombinant human synuclein derivatives (i.e.  $\alpha$ Syn, 6xHis- $\alpha$ Syn, 6xHis- $\alpha$ Syn(1-96), and  $\alpha$ Syn-GFP), were produced and purified as previously detailed<sup>1,2</sup>. Briefly, BL21\*(DE3) *Escherichia coli* pLysS cells were transformed, using the heat-shock method, with pRSET-B plasmid containing the human  $\alpha$ Syn gene and selected in Luria-Bertani (LB) Agar Amp<sup>+</sup> (0.1 mg/ml) solid culture medium overnight. The transformed cells were grown at 37°C in LB broth Amp<sup>+</sup> (0.05 mg/ml) and induced (OD = 0.6) with isopropyl  $\beta$ -D-1-thiogalactopyranoside (IPTG, 0.1 mg/ml) under vigorous shaking. For  $\alpha$ Syn and  $\alpha$ Syn-GFP, after 3 h of IPTG induction, bacteria were harvested by centrifugation (6,000 rpm, 15 min, at 4°C), and the pellet was sonicated in 40 mM Tris-HCl, pH 8.0, 0.1 M NaCl (buffer A). After 10-min boiling, the suspension was centrifuged (12,000 rpm, 10 min, 4°C). The supernatant, containing soluble  $\alpha$ Syn or  $\alpha$ Syn-GFP, was dialyzed overnight at 4°C against buffer A, containing 2 mM EDTA. For 6xHis- $\alpha$ Syn and 6xHis- $\alpha$ Syn(1-96), after sonication in buffer A, the recombinant proteins were purified by IMAC. Bacterial lysis supernatant (50 ml) was loaded onto a fast-flow Ni<sup>2+</sup>-IMAC (1 x 3 cm) HiTrap column, using a model P-1 peristaltic pump (Pharmacia, Uppsala, Sweden) at a flow rate of 0.1 ml/min. The flow-through was discarded and the column connected to an Äkta-purifier system (Marlborough, MA, USA). After washing with buffer A (60 ml), 6xHis-tagged proteins were eluted from the column (0.5 ml/min) with buffer A, pH 6.5, containing 0.4 M imidazole. The material eluted in correspondence of the major chromatographic peak was collected and dialyzed overnight at 4°C against phosphate buffered saline, pH 7.4. Recombinant proteins were further purified by RP-HPLC on a semipreparative column C18 (10 x 250 mm, 5 $\mu$ m, 300Å) from Grace-Vydac (Hesperia, CA, USA), eluted with a linear acetonitrile-0.078% trifluoroacetic acid gradient at a flow rate of 1.5 ml/min. After lyophilization, recombinant proteins in water:acetonitrile (1:1 v/v), containing 1% formic acid, were characterized by high-resolution mass spectrometry using a Waters (Milford, MA, USA) Xevo-G2S Q-TOF spectrometer. To obtain purified  $\alpha$ Syn in the monomeric state, the lyophilized protein (1 mg) was dissolved in 2 mM NaOH (100  $\mu$ l) and 1M NaOH (10  $\mu$ l), up to pH 11.0. After centrifugation (15,000 rpm, 15 min), the supernatant was removed and added with 0.1 M Tris-HCl, pH 7.0 (200  $\mu$ l), down to pH 8.0.-Freshly dissolved  $\alpha$ Syn samples were used for further spectroscopic and functional analyses. The purified  $\alpha$ Syn solutions were divided into aliquots, lyophilized, and stored at -20°C. After thawing in an ice-water bath,  $\alpha$ Syn aliquots were immediately used for subsequent functional/binding analyses.

### *Enzymatic activity assays*

Briefly, human fibrinogen (Fb) ( $\epsilon^M_{280\text{nm}} = 5.1 \cdot 10^5 \text{ M}^{-1} \cdot \text{cm}^{-1}$ ) was desalted on an in-house packed (8x125mm) G10 fast-flow column (GE Healthcare, Chicago, IL, USA) eluted with HBS, pH 7.4, at a flow-rate of 0.3 ml/min. Freshly prepared Fb (0.35  $\mu$ M) was reacted at 37°C with human  $\alpha$ T (300 pM) in the presence of 15  $\mu$ M  $\alpha$ Syn and at fixed time points proteolysis mixtures were added with formic acid (2% v/v final concentration) to block the proteolysis reaction and induce precipitation of unreacted Fb. After centrifugation (10,000 g, 5 min, 4°C), the supernatant (1.0 ml) was removed, lyophilized, dissolved in a 6 M guanidinium hydrochloride solution (170  $\mu$ l) and injected (100  $\mu$ l) into a RP-HPLC (4.6 x 250 mm) C18 column (Grace-Vydac, Columbia, MD, USA). The column was equilibrated with 40 mM ammonium phosphate buffer, pH 3.1, and eluted with an acetonitrile gradient. The absorbance of the effluent was recorded at 205 nm and the amount of released FpA ( $\epsilon^M_{205\text{nm}} = 4.40 \cdot 10^4 \text{ M}^{-1} \cdot \text{cm}^{-1}$ ) and FpB ( $\epsilon^M_{205\text{nm}} = 5.12 \cdot 10^4 \text{ M}^{-1} \cdot \text{cm}^{-1}$ ) was determined by integrating the area under the chromatographic peaks. A LC-4000 HPLC system (Jasco, Tokyo, Japan) was used for all analyses.

Specificity constants,  $k_{\text{cat}}/K_m$ , for fibrinopeptide release of were determined by interpolating the data points to **equations 1** and **2**<sup>3,4</sup>:

$$[\text{FpA}]_t = [\text{FpA}]_\infty \cdot (1 - e^{-k't}) \quad (\text{eq. 1})$$

$$[\text{FpB}]_t = [\text{FpB}]_\infty \cdot (1 + \alpha \cdot e^{-k't} - \beta \cdot e^{-k''t}) \quad (\text{eq. 2})$$

where  $[\text{FpA}]_t$  or  $[\text{FpB}]_t$  and  $[\text{FpA}]_\infty$  or  $[\text{FpB}]_\infty$  are the concentration of FpA or FpB at time  $t$  and  $\infty$ , respectively, and  $k'$  and  $k''$  are the observed kinetic constants for the release of FpA or FpB, obtained as fitting parameters. Under pseudofirst-order conditions and low substrate concentration, the specificity constants could easily be determined as  $k_{\text{catA}}/K_{\text{mA}} = k'/[\text{E}]$  and  $k_{\text{catB}}/K_{\text{mB}} = k''/[\text{E}]$ , where  $[\text{E}]$  is the protease concentration.

Hydrolysis of the synthetic peptide PAR1(38-60) (1  $\mu\text{M}$ ) by  $\alpha\text{T}$  (150 pM) was carried out at 25°C in TBS, in the presence of  $\alpha\text{Syn}$  (15  $\mu\text{M}$ ). At time points, aliquots (360  $\mu\text{l}$ ) were taken, acid quenched (10  $\mu\text{l}$ , 4% aqueous TFA) and loaded (350  $\mu\text{L}$ ) onto a Grace-Vydac (4.6 x 250 mm) C18 column. The column was eluted with a linear acetonitrile-0.078% TFA gradient from 10-45% in 40 min and the release of PAR1(42-60) ( $\epsilon_{205\text{nm}}^{\text{M}} = 95870 \text{ M}^{-1} \cdot \text{cm}^{-1}$ ) was quantified by integrating the area under the chromatographic peak. The kinetic data were interpolated with **equation 3**, describing a pseudo-first order reaction <sup>3-5</sup>:

$$[\text{P}]_t = [\text{P}]_\infty \cdot [1 - \exp(-k_{\text{obs}} \cdot t)] \quad (\text{eq. 3})$$

where  $[\text{P}]_\infty$  is the concentration of the fragment PAR1(42-60) when the proteolysis reaction was complete and  $k_{\text{obs}}$  is the observed kinetic constant for PAR1(38-60) hydrolysis, obtained as a fitting parameter. Regarding the release of fibrinopeptides, under pseudofirst-order conditions and low substrate concentration,  $k_{\text{cat}}/K_{\text{m}}$  could be derived as  $k_{\text{obs}}/[\text{E}]$ . Notably, PAR1(38-60) reproduces the substrate binding properties of the extracellular PAR1 domain in platelets, as it contains both the exosite-1 binding sequence for  $\alpha\text{T}$  and the scissile bond Arg<sup>41</sup>-Ser<sup>42</sup>.

The difference in free energy change of binding of a substrate ( $\Delta\Delta G_b^*$ ) to the enzyme active site in the transition state, in the absence (-) and presence (+) of  $\alpha\text{Syn}$ , is given by equation 4:

$$\Delta\Delta G_b^* = -RT \cdot \ln \frac{s^+}{s^-} \quad \text{eq. 4}$$

where  $R$  is the gas constant (1.987 cal/(mol·K)),  $T$  is the absolute temperature (K), and  $s$  is the specificity constant ( $s = k_{\text{cat}}/K_{\text{m}}$ ) of the enzyme-catalysed reaction. The effect (either positive or negative) of  $\alpha\text{Syn}$  on  $\alpha\text{T}$  catalysis is taken as significant when  $\Delta\Delta G_b^*$  is greater, in absolute value, than the internal energy ( $E$ ) of the system at a given temperature:  $E = R \cdot T$  <sup>6,7</sup>.

#### *Dynamic light scattering*

Measurements were performed at 37°C on a Zetasizer-Nano-S instrument (Malvern Instruments, Worcestershire, UK) at a fixed angle (i.e. 173°) from the incident light (i.e. He-Ne 4 mW laser source at 633 nm). Polystyrene cuvettes (1-cm path length, 100  $\mu\text{l}$ ) (Hellma, Switzerland) were used for all measurements. Each measurement consisted of a single run (15 s). Scattering data were analyzed with Nano-6.20 software and expressed as percentage of volume size distribution, from which the value of  $d_H$  and %PD were extracted <sup>5</sup>, where  $d_H$  is the diameter of a hard sphere that diffuses at the same speed as the molecule being measured, and %PD is the width of the particle size distribution of a protein in a given sample.

#### *Fluorescence spectroscopy.*

The data points were interpolated with **equation 5**, describing the single-site binding model  $\text{R} + \text{L} \leftrightarrow \text{RL}$  <sup>8</sup>:

$$\Delta F = \Delta F_{\text{max}} \cdot \frac{[\text{L}]}{K_d + [\text{L}]} \quad (\text{eq. 5})$$

where L is the concentration of the ligand,  $\Delta F$  and  $\Delta F_{\max}$  are the changes in fluorescence intensity measured at intermediate or saturating ligand concentrations, while the dissociation constant,  $K_d$ , was obtained as a fitting parameter. For Hir(1-47) and [F]-hirugen binding to  $\alpha T$ , fluorescence data were interpolated with **equation 6**, describing the tight-binding model <sup>8</sup>.

$$\Delta F = \Delta F_{\max} \cdot \frac{b + \sqrt{b^2 - 4[R][L]}}{2[R]} \quad (\text{eq. 6})$$

$$b = ([R] + [L] + K_d)$$

where [R] and [L] are the total enzyme or ligand concentrations.

The difference in free energy change of binding of a ligand/inhibitor ( $\Delta\Delta G_b$ ) to  $\alpha T$ , in the absence (-) and presence (+) of  $\alpha Syn$ , is given by **equation 7**:

$$\Delta\Delta G_b = RT \cdot \ln \frac{K_d +}{K_d -} \quad (\text{eq. 7})$$

where R is the gas constant (1.987 cal/(mol·K)), T is the absolute temperature (K),  $K_d$  is the dissociation constant of thrombin-ligand complex. The effect (either positive or negative) of  $\alpha Syn$  on  $\alpha T$  binding is taken as significant when  $\Delta\Delta G_b$  is greater, in absolute value, than the internal energy (E) of the system at a given temperature:  $E = R \cdot T$  <sup>6,7</sup>.

#### *Surface plasmon resonance*

The dissociation constant ( $K_d$ ) relative to the binding of  $\alpha T$  to immobilized  $\alpha Syn$  was obtained as a fitting parameter by plotting the RU value at the steady state ( $RU_{eq}$ ) *versus* [ $\alpha T$ ] and interpolating the data points with **equation 8**, describing 1:1 binding model:

$$RU_{eq} = RU_{\max} \cdot \frac{[L]}{K_d + [L]} \quad (\text{eq. 8})$$

where L is the concentration of  $\alpha T$ , while  $RU_{eq}$  and  $RU_{\max}$  are the RU values measured (at the steady state) with intermediate or saturating [L] <sup>3,4</sup>.

#### *Isothermal titration calorimetry (ITC)*

ITC titrations were performed at  $25 \pm 0.1^\circ C$  in 20 mM HEPES pH 7.4, 0.15M, using a MicroCal VP-ITC instrument, as described <sup>9</sup>. To a S195A thrombin mutant solution (1.7 ml, 2  $\mu M$ ) were sequentially added 25 aliquots (10  $\mu l$  each) of  $\alpha Syn$  stock solution (40  $\mu M$ ), under continuous stirring (307 r.p.m.) and a delay of 4 min after each injection. Before analysis, protein samples were dialyzed overnight in the same buffer, using a Slide-A-Lyzer (3.5-kDa cut-off) from ThermoFischer Scientific (Waltham, MA, USA), and thoroughly degassed. The heat of dilution was determined in control experiments by injecting aliquots (10  $\mu l$ ) of  $\alpha Syn$  stock solution (40  $\mu M$ ) into buffer and this was subtracted from the integrated binding isotherm prior to curve fitting. The thermograms were analysed using the MicroCal ITC Data Analysis software.

### **Extended Results**

For the wild-type  $\alpha Syn$  and  $\alpha Syn$ -GFP protein mutant, the bacterial pellet was sonicated and then boiled for 10 min. After centrifugation, the supernatant enriched with  $\alpha Syn$  or  $\alpha Syn$ -GFP was dialyzed and further

purified by RP-HPLC. At variance, 6xHis- $\alpha$ Syn and 6xHis- $\alpha$ Syn(1-96) were purified by immobilized metal ion affinity chromatography (IMAC), followed by RP-HPLC. The purity of  $\alpha$ Syn species was checked by SDS-PAGE and RP-HPLC (>98%), while their chemical identity was established by high-resolution mass spectrometry, which was found in agreement with the protein amino acid composition within 20 ppm mass accuracy (**Supplementary Table S1 and Figure S1**). The monomerization of purified  $\alpha$ Syn was achieved by alkaline treatment, i.e. dissolution of  $\alpha$ Syn lyophilizate with NaOH solution, at pH 11.0, followed by the addition of 0.1 M Tris-HCl, pH 7.0, down to pH 8.0<sup>10</sup> (see below).

#### *Monomerization of recombinant $\alpha$ Syn*

With the aim to obtain highly monomeric  $\alpha$ Syn preparations for subsequent spectroscopic and functional analysis, different conditions were explored, including i) TBS [5 mM Tris-HCl, pH 8.0, 0.2 M NaCl, 0.1% PEG-8000 (v/w)], ii) TBS containing 7% (v/v) DMSO, iii) TBS containing 5 M Gnd-HCl, or iv) 50 mM Tris-HCl, pH 8.0, after alkaline treatment. Notably, the alkaline treatment consisted in the dissolution of  $\alpha$ Syn lyophilizate with NaOH solution, at pH 11.0, followed by addition of an equal volume of 0.1 M Tris-HCl, pH 7.0, down to pH 8.0.

The presence of protein aggregates was estimated from the shape of UV-absorption spectra (**Supplementary Fig. 1B**), i.e. the ratio of the absorbance values at 275 and 250 nm ( $r = A_{275\text{nm}}/A_{250\text{nm}}$ ), and from the relative intensity of the apparent fluorescence emission of  $\alpha$ Syn solutions ( $F/F_0$ ) at increasing protein concentrations (**Supplementary Fig. 1C**). The  $A_{275\text{nm}}/A_{250\text{nm}}$  ratio is a sensitive measure of protein aggregation, as the intensity of the scattered light exponentially increases at lower wavelengths. Likewise, the slope of the straight line of  $F/F_0$  vs. [ $\alpha$ Syn] is a signature of the presence of protein aggregates that more intensely scatter light, which is then recorded as “apparent” fluorescence emission. UV-absorption and fluorescence spectra of  $\alpha$ Syn solutions were compared with those of a model compound solution, 2:1 (mol:mol)  $N^\alpha$ -acetyl-Tyr-NH<sub>2</sub> /  $N^\alpha$ -acetyl-Phe-NH<sub>2</sub> solution, which was taken as a model of Tyr and Phe spectroscopic properties in  $\alpha$ Syn monomeric state.

UV-absorption spectra (**Supplementary Fig. 1B**) of  $\alpha$ Syn show that in TBS alone the  $r = 1.6$ , is markedly lower than that estimated for the model compound solution ( $r = 3.1$ ), suggesting the presence of protein aggregates. Addition of 5 M Gnd-HCl or 7% DMSO to TBS, or alkaline treatment progressively increased  $r$  values ( $r = 3.0$ ) up to those of model compound solution. Likewise, fluorescence data (**Supplementary Fig. 1C**) show that only alkaline treatment proved effective in decreasing the slope ( $m$ ) of the interpolating straight line in the plot of  $F/F_0$  vs. [ $\alpha$ Syn], measured in TBS alone ( $m = 0.2$ ), to a value identical to that obtained for the model compound solution ( $m = 0.02$ ).

The monomeric state of  $\alpha$ Syn preparation after alkaline treatment was confirmed by Dynamic Light Scattering (DLS) measurements, from which the hydrodynamic diameter ( $d_H$ ) and the percent polydispersity (%PD) were extracted (**Supplementary Fig. 1D**). Notably,  $d_H$  is the diameter of a hard sphere that diffuses at the same speed as the molecule being measured, while %PD is a parameter describing the width of the particle size distribution of a protein in a given sample. In DLS analysis, the time-dependent fluctuations of scattered light from molecules of different size in solution is measured and from the rate of these fluctuations the translational diffusion coefficient ( $D$ ) is determined. The value of  $d_H$  is then derived from the Stokes-Einstein equation,  $d_H = 2 \cdot kT / 6\pi\eta D$ , where  $k$  is the Boltzmann constant,  $T$  is the absolute temperature and  $\eta$  is the solution viscosity. The monomeric state of the  $\alpha$ Syn preparation was confirmed by dynamic light scattering measurements (DLS), from which a hydrodynamic diameter ( $d_H$ ) of  $56 \pm 6$  Å was estimated, with a percent polydispersity (%PD) as low as 11.6% (**Supplementary Figure S1**), indicative of a monodispersed protein solution. Notably, the size of  $\alpha$ Syn reported in this study is lower than that predicted for a fully unfolded protein of 140 amino acids such as  $\alpha$ Syn ( $d_H^U = 68$  Å), but still compares favorably with that determined

experimentally by small-angle X-ray scattering ( $d_H = 54 \pm 2 \text{ \AA}$ ) and size-exclusion chromatography ( $d_H = 55 \pm 6 \text{ \AA}$ )<sup>10</sup>, and is in agreement with the loosely packed dynamic structure recently elucidated for monomeric  $\alpha$ Syn<sup>11</sup>.

**Supplementary Table 1: Molecular mass of recombinant  $\alpha$ Syn species**

| $\alpha$ Syn species  | MW <sub>th</sub> (a.m.u.) | MW <sub>exp</sub> (a.m.u.) |
|-----------------------|---------------------------|----------------------------|
| $\alpha$ Syn(1-140)   | 14460.1                   | 14458.8                    |
| $\alpha$ Syn(103-140) | 4288.4                    | 4288.2                     |
| $\alpha$ Syn(1-96)    | 11120.7                   | 11120.3                    |

Average mass values were determined on RP-HPLC purified  $\alpha$ Syn species, using a Xevo G2S Q-TOF spectrometer.

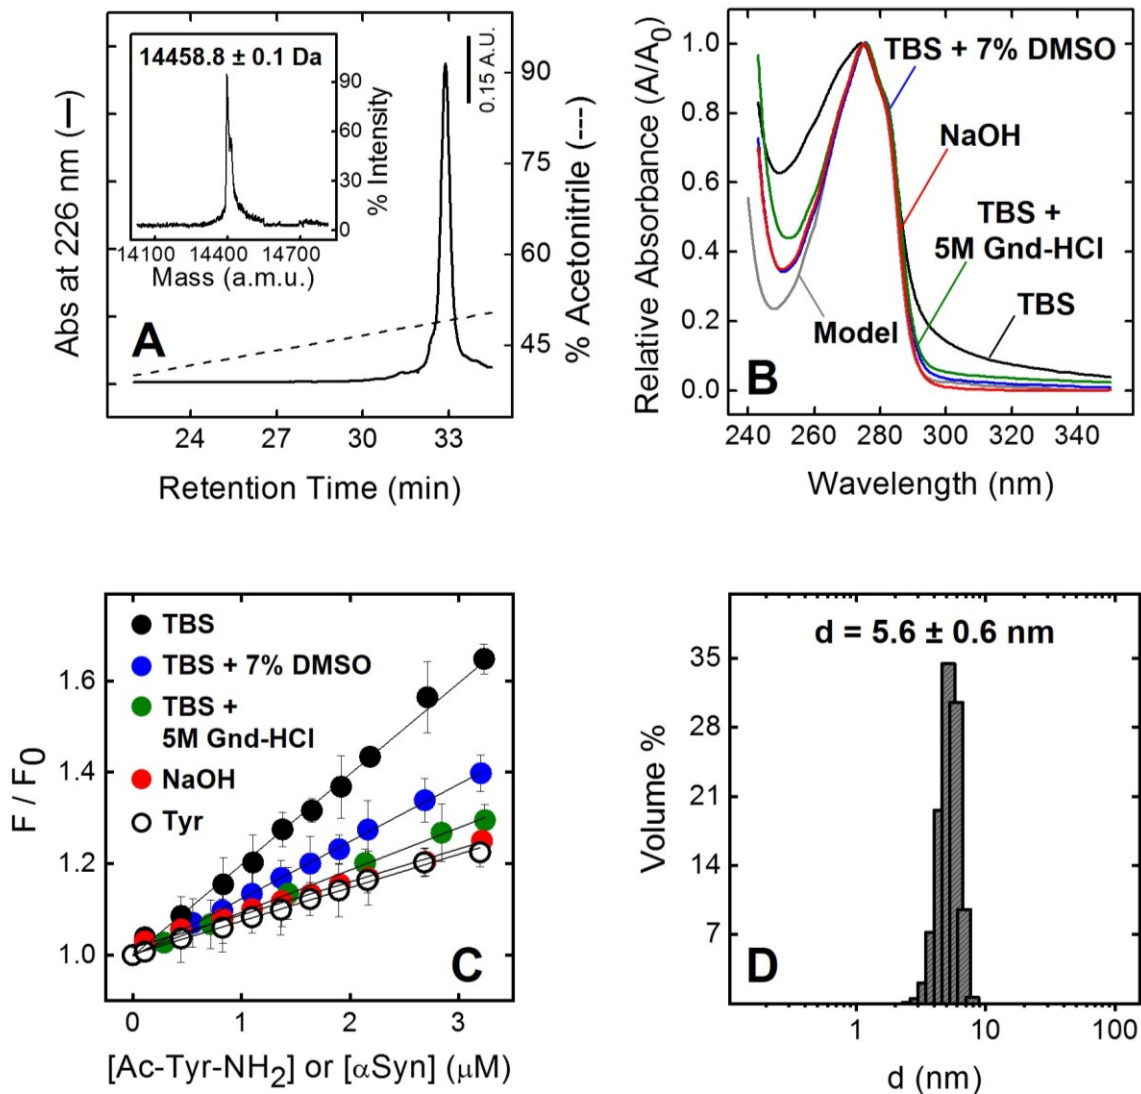

**Supplementary Figure S1. Purification and Characterization of monomeric  $\alpha$ Syn.** (A) RP-HPLC analysis of purified recombinant  $\alpha$ Syn, using a semipreparative (1x25 cm) C18 column eluted with a linear 0.078% TFA-acetonitrile gradient (---). (Inset) MS analysis of RP-HPLC purified  $\alpha$ Syn. (B) Near-UV absorption spectra of  $\alpha$ Syn (130  $\mu$ M) in different solvents (—) TBS: 5mM Tris-HCl, pH 8.0, 0.2 M NaCl, 0.1% PEG-8000 (v/w); (—) TBS-DMSO: TBS containing 7% (v/v) DMSO; (—) TBS-Gnd: TBS containing 5 M Gnd-HCl; (—) NaOH:  $\alpha$ Syn was first dissolved in 100  $\mu$ l of 2 mM NaOH and 10  $\mu$ l of 1 M NaOH and then added with 200  $\mu$ l of 0.1 M Tris-HCl pH 7.0 (see Methods). UV-absorption spectra of  $\alpha$ Syn samples at 25°C. The nominal  $\alpha$ Syn concentration was the same under all experimental conditions and the spectra were normalized ( $A/A_0$ ) for the absorbance intensity of  $\alpha$ Syn in TBS ( $A_0$ ) at the  $\lambda_{\max}$  (275 nm). As a control, the spectrum of Ac-Tyr-NH<sub>2</sub> and Ac-Phe-NH<sub>2</sub>, mixed in the same molar ratio (2:1) as that present in  $\alpha$ Syn (Model), is also reported (—). (C) Concentration-dependence of  $\alpha$ Syn fluorescence intensity recorded at 25°C under different solvent conditions, as reported above.  $\alpha$ Syn samples were excited at 280nm and the fluorescence signal was recorded at the  $\lambda_{\max}$  (303nm). The data are expressed as  $F/F_0$  ratio, where  $F$  and  $F_0$  is the fluorescence signal of the buffer solvent in the presence or absence of increasing [ $\alpha$ Syn]. For comparison, the data of Ac-Tyr-NH<sub>2</sub> (Tyr,  $\circ$ ) emission in TBS are also included. Linear interpolation of the fluorescence data yielded the following slope values: TBS,  $0.201 \pm 0.004$ ; TBS-DMSO,  $0.125 \pm 0.001$ ; TBS-Gnd,  $0.092 \pm 0.001$ ; NaOH,  $0.022 \pm 0.001$ ; Tyr,  $0.073 \pm 0.001$ . (D) DLS analysis at 37°C of purified  $\alpha$ Syn (50  $\mu$ M) after alkaline treatment, as described above. The data are expressed as the volume size distribution and  $d$  is the average molecular diameter.

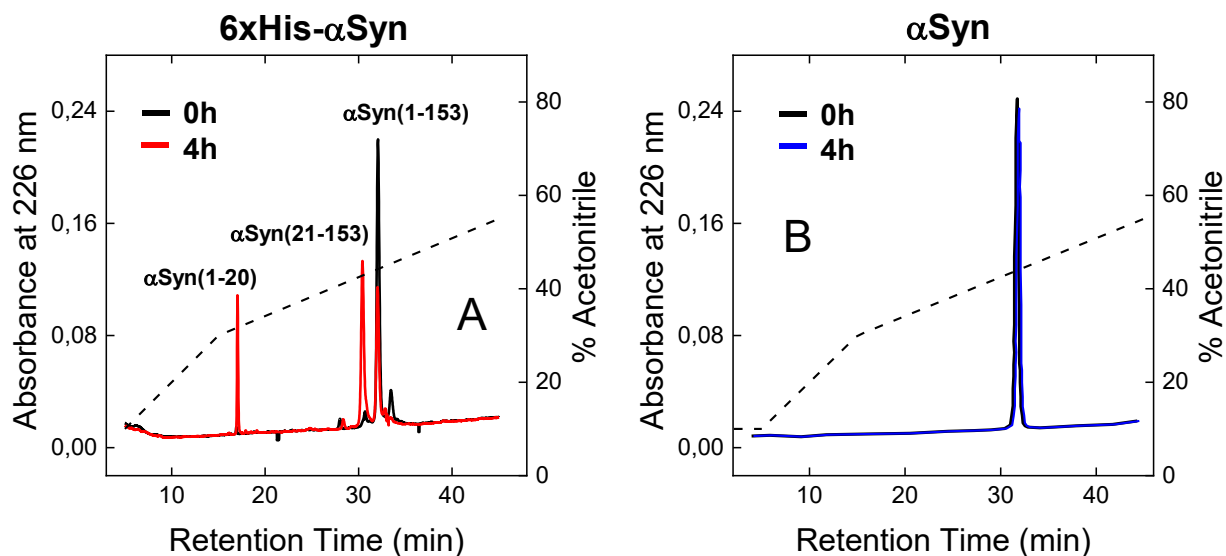

**Supplementary Figure S2. Proteolysis of recombinant  $\alpha$ Syn (A) and 6xHis- $\alpha$ Syn (B) by  $\alpha$ T.** RP-HPLC analysis of the proteolysis reaction of  $\alpha$ Syn and 6xHis- $\alpha$ Syn (5  $\mu$ M) with  $\alpha$ T (72 nM), carried out for 4 hours at r.t. in TBS, pH 7.4. An aliquot (300  $\mu$ l) of the proteolysis reactions was loaded onto a Grace-Vydac C18 (4.6 x 150 mm) column, eluted with a linear acetonitrile/0.1%-TFA gradient (---) at a constant flow rate (0.8 ml/min). The absorbance of the effluent was recorded at 220 nm. The material eluted with the chromatographic peaks was collected and analysed by high-resolution mass spectrometry. The labels near the chromatographic peaks refer to the proteolysis products of  $\alpha$ Syn and 6xHis- $\alpha$ Syn. The data clearly indicate that, under the experimental condition used in this work,  $\alpha$ T can cleave 6xHis- $\alpha$ Syn at Lys<sup>6</sup>-Gly<sup>7</sup> peptide bond, whereas underivatized  $\alpha$ Syn is fully resistant to  $\alpha$ T proteolysis.



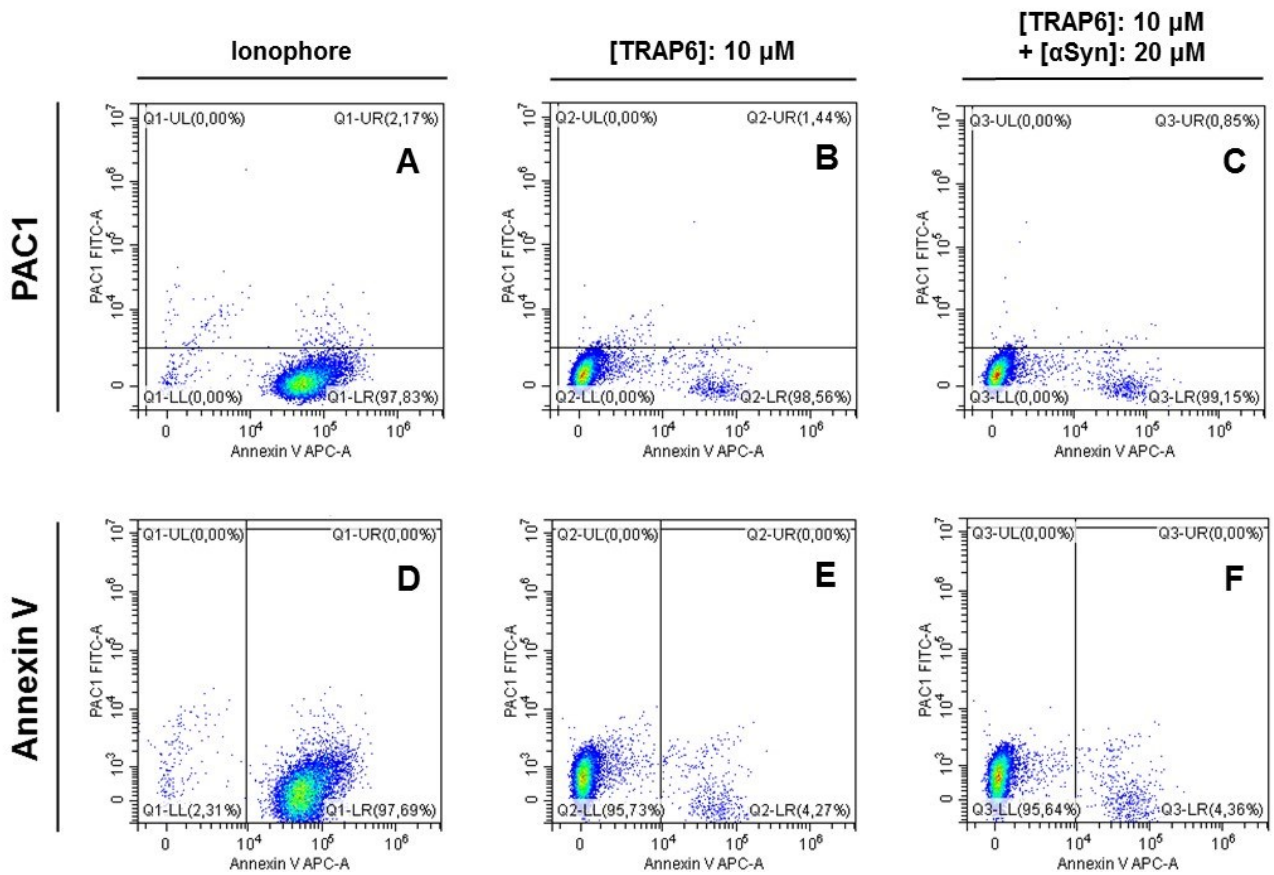

**Supplementary Figure S3.** Representative flow cytometry dot plots of the total per cent expression of activated GpIIb/IIIa and phosphatidylserine (PS), as given by PAC1 (panels **A**, **B**, **C**) and annexin-V (panels **D**, **E**, **F**) assays ( $n = 3$ ), respectively, after activation with the ionophore A23187 ( $5 \mu\text{M}$ ) (**A**, **D**), TRAP6 alone ( $10 \mu\text{M}$ ) (**B**, **E**) and TRAP6 ( $10 \mu\text{M}$ ) (**C**, **F**) in the presence of  $\alpha\text{Syn}$  ( $20 \mu\text{M}$ ). Vertical and horizontal lines indicate the gating strategy. Q1-UR, Q2-UR and Q3-UR values indicate the total % expression of activated GpIIb/IIIa (PAC1) under different activation conditions. Q1-LR, Q2-LR and Q3-LR values indicate the total % expression of PS (Annexin V) under different activation conditions. For details, see Materials and Methods.

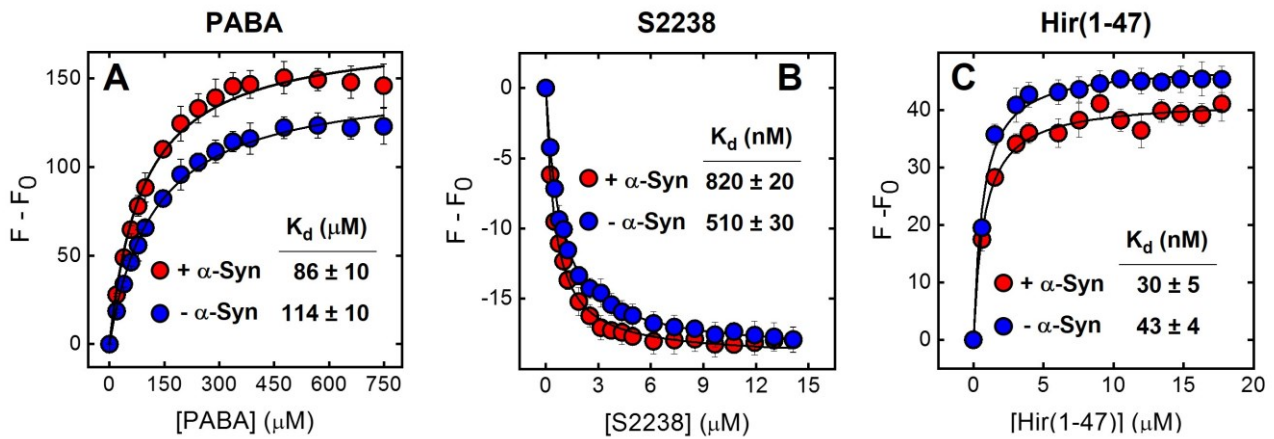

**Supplementary Figure S4. Probing the role of thrombin active site in  $\alpha$ Syn- $\alpha$ T interaction.** Effect of  $\alpha$ Syn on the affinity of the active-site ligands PABA (A), S2238 (B), or Hir(1-47) (C) for thrombin. Fluorescence binding measurements were carried out in HBS at 37°C by adding increasing ligand concentrations to thrombin solutions, in the absence or presence of 20  $\mu\text{M}$   $\alpha$ Syn. For the binding of PABA, samples (40 nM) were excited at 336nm, the fluorescence intensity of the ligand was recorded at 375 nm and corrected for inner filter effect. With S2238 and Hir(1-47), protein samples (50 nM and 70 nM, respectively) were excited at 295 nm, while thrombin fluorescence was recorded at 334 nm. When the binding of S2238 to thrombin was being studied, the inactive S195A mutant was used. The data points relative to the binding of PABA and S2238 were interpolated with eq. 5, describing a single-site interaction model, while the data for the binding of Hir(1-47) were fitted with eq. 6, describing a tight-binding model. After interpolation, the  $K_d$  values were obtained as fitting parameters, as indicated.

## References

- 1 Negro, A., Brunati, A. M., Donella-Deana, A., Massimino, M. L. & Pinna, L. A. Multiple phosphorylation of alpha-synuclein by protein tyrosine kinase Syk prevents eosin-induced aggregation. *Faseb j* **16**, 210-212, doi:10.1096/fj.01-0517fje (2002).
- 2 Albani, D. *et al.* Protective effect of TAT-delivered alpha-synuclein: relevance of the C-terminal domain and involvement of HSP70. *Faseb j* **18**, 1713-1715, doi:10.1096/fj.04-1621fje (2004).
- 3 Pontarollo, G. *et al.* Non-canonical proteolytic activation of human prothrombin by subtilisin from *Bacillus subtilis* may shift the procoagulant-anticoagulant equilibrium toward thrombosis. *J Biol Chem* **292**, 15161-15179, doi:10.1074/jbc.M117.795245 (2017).
- 4 Acquasaliente, L. *et al.* Molecular mapping of alpha-thrombin (alphaT)/beta2-glycoprotein I (beta2GpI) interaction reveals how beta2GpI affects alphaT functions. *Biochem J* **473**, 4629-4650, doi:10.1042/bcj20160603 (2016).
- 5 Sokolov, A. V. *et al.* Thrombin inhibits the anti-myeloperoxidase and ferroxidase functions of ceruloplasmin: relevance in rheumatoid arthritis. *Free Radic Biol Med* **86**, 279-294, doi:10.1016/j.freeradbiomed.2015.05.016 (2015).
- 6 Copeland, A. R. *Enzymes. A practical introduction to structure, mechanism, and data analysis*. Second edn, 122-123 (2000).
- 7 De Filippis, V., Quarzago, D., Vindigni, A., Di Cera, E. & Fontana, A. Synthesis and characterization of more potent analogues of hirudin fragment 1-47 containing non-natural amino acids. *Biochemistry* **37**, 13507-13515, doi:10.1021/bi980717n (1998).
- 8 Pozzi, N. *et al.* Loop Electrostatics Asymmetry Modulates the Preexisting Conformational Equilibrium in Thrombin. *Biochemistry* **55**, 3984-3994, doi:10.1021/acs.biochem.6b00385 (2016).
- 9 Ricatti, J. *et al.* Effects of point mutations in the binding pocket of the mouse major urinary protein MUP20 on ligand affinity and specificity. *Sci Rep* **9**, 300, doi:10.1038/s41598-018-36391-3 (2019).
- 10 Uversky, V. N., Li, J. & Fink, A. L. Evidence for a partially folded intermediate in alpha-synuclein fibril formation. *J Biol Chem* **276**, 10737-10744, doi:10.1074/jbc.M010907200 (2001).
- 11 Theillet, F. X. *et al.* Structural disorder of monomeric  $\alpha$ -synuclein persists in mammalian cells. *Nature* **530**, 45-50, doi:10.1038/nature16531 (2016).
